# Supplementary material for: Simultaneous determination of dexamethasone and lenalidomide in rat plasma by solid phase extraction and ultra-performance liquid chromatography-tandem mass spectrometry: application to pharmacokinetic studies
Source: Royal Society of Chemistry journal article supplement (doi:10.1039/c5ra22339c), 2015-01-01
Supplement: c5ra22339c1.pdf [file c5ra22339c1.pdf]

Table 1: Comparison between our current manuscript with previous literature dealing with the analysis of LND and DEX in biological fluids.

| Analytical method<br>[Reference number] | Linearity range                              | LOD           | LOQ       | Application                                                                                           | Remarks                                                                                                                                                                                                                                               |
|-----------------------------------------|----------------------------------------------|---------------|-----------|-------------------------------------------------------------------------------------------------------|-------------------------------------------------------------------------------------------------------------------------------------------------------------------------------------------------------------------------------------------------------|
| <b>LND</b>                              |                                              |               |           |                                                                                                       |                                                                                                                                                                                                                                                       |
| <b>HPLC-UV</b>                          |                                              |               |           |                                                                                                       |                                                                                                                                                                                                                                                       |
| [26]                                    | 0.1-50 nM                                    | 0.009 nM      | 0.1 nM    | Determination of LND in human plasma and cerebrospinal fluid                                          | *SPE of the analyzed samples.<br>*Total run time was 7 min. LND was eluted at 5.5 min.                                                                                                                                                                |
| <b>HPLC-fluorimetry</b>                 |                                              |               |           |                                                                                                       |                                                                                                                                                                                                                                                       |
| [27]                                    | 5-100 ng/mL                                  | 0.8 ng/mL     | 2.3 ng/mL | Determination of LND in spiked plasma samples.                                                        | *Protein precipitation of the analyzed samples with acetonitrile followed by complexation of the endogenous amino acids with copper ions.<br>*Precolumn derivatization with fluorescamine.<br>*Total run time was 20 min. LND was eluted at 11.6 min. |
| <b>HPLC-MS</b>                          |                                              |               |           |                                                                                                       |                                                                                                                                                                                                                                                       |
| [28]                                    | The same analytical method as reference [24] |               |           | Estimation of the maximum tolerated dose (MTD), describes toxicities, and evaluates pharmacokinetics. | *SPE of blood samples                                                                                                                                                                                                                                 |
| [29]                                    | 5-100 ng/mL                                  | Not mentioned | 5 ng/mL   | -Quantitation of LND in human plasma.<br>-Application to a pharmacokinetic study in a single patient. | *LLE of the plasma samples with acetonitrile/1-chlorobutane (4:1, v/v).<br>* Total run time was 8 min. LND was eluted at 3.2 min.                                                                                                                     |
| <b>LC-MS/MS</b>                         |                                              |               |           |                                                                                                       |                                                                                                                                                                                                                                                       |
| [30]                                    | 2-1000 ng/mL                                 | Not mentioned | 2 ng/mL   | -Quantitation of LND in human plasma                                                                  | *SPE of plasma samples.<br>*Box-Behnken experimental design was applied for the validation of robustness.<br>* Total run time was                                                                                                                     |

|                       |                   |               |             |                                                                                                                                                                                    |                                                                                                                                                                                              |
|-----------------------|-------------------|---------------|-------------|------------------------------------------------------------------------------------------------------------------------------------------------------------------------------------|----------------------------------------------------------------------------------------------------------------------------------------------------------------------------------------------|
|                       |                   |               |             |                                                                                                                                                                                    | 3 min. LND was eluted at 1.04 min.                                                                                                                                                           |
| [31]                  | 0.97-486.19 ng/mL | Not mentioned | 0.97 ng/mL  | -Simultaneous quantitation of LND, idelalisib, and fudarabine in rat plasma.<br>-Application to a pharmacokinetic study.                                                           | *LLE of plasma samples with t-butyl methyl ether.<br>* Total run time was 4 min. LND was eluted at 3.0 min                                                                                   |
| [32]                  | 5-1000 ng/mL      | Not mentioned | 5 ng/mL     | -Assessment of the pharmacokinetics of [ <sup>14</sup> C] LND following oral administration in healthy human subjects.<br>-Application to plasma, feces, urine, and semen samples. | * All samples required pH adjustment before analysis.<br>*The use of radio-scintillation counter for measuring the radioactivity.<br>* Total run time was 50 min. LND was eluted at 30.1 min |
| [33]                  | 1-1000 nM         | Not mentioned | 1 nM        | -Simultaneous quantitation of LND and flavopiridol in human plasma.                                                                                                                | * LLE of plasma samples.<br>* Total run time was 10 min. LND was eluted at 1.04 min.                                                                                                         |
| <b>UPLC-MS/MS</b>     |                   |               |             |                                                                                                                                                                                    |                                                                                                                                                                                              |
| [34]                  | 0.23-1000 ng/mL   | Not mentioned | 0.23 ng/mL  | -Determination of LND in spiked animal and human plasma samples.                                                                                                                   | *Protein precipitation of plasma samples with methanol.<br>* Total run time was 3 min. LND was eluted at 0.70 min.                                                                           |
| <b>Current method</b> | 0.01-0.5 ng/mL    | 0.004 ng/mL   | 0.01 ng/mL  | -Determination of LND and DEX in plasma samples.<br>-Determination of the pharmacokinetics of LND either alone or in combination with LND following oral administration to rats.   | *SPE of the analyzed sample.<br>* Total run time was 1.5 min. LND was eluted at 0.36 min.                                                                                                    |
| <b>DEX</b>            |                   |               |             |                                                                                                                                                                                    |                                                                                                                                                                                              |
| <b>HPLC-UV</b>        |                   |               |             |                                                                                                                                                                                    |                                                                                                                                                                                              |
| [35]                  | 0.702-70.2 ng/mL  | Not mentioned | 0.702 ng/mL | -Evaluation of the pharmacodynamics, pharmacokinetics, and comparative bioavailability of a commercial oral                                                                        | *LLE of plasma samples with diethylether.<br>* Total run time was 25.5 min.                                                                                                                  |

|                 |               |               |           |                                                                                                                                                              |                                                                                                                                                   |
|-----------------|---------------|---------------|-----------|--------------------------------------------------------------------------------------------------------------------------------------------------------------|---------------------------------------------------------------------------------------------------------------------------------------------------|
|                 |               |               |           | DEX formulation intended for pediatric use relative to those in tablets.<br>-Determination of DEX in human plasma.                                           |                                                                                                                                                   |
| <b>LC-MS</b>    |               |               |           |                                                                                                                                                              |                                                                                                                                                   |
| [36]            | 6-100 ng/mL   | 1 ng/mL       | 6 ng/mL   | -Determination of DEX in sheep plasma.<br>-Application to a pharmacokinetic study.                                                                           | * SPE of plasma samples.<br>*Total run time was 9 min. DEX was eluted at 5.83 min.                                                                |
| [37]            | 4.5-450 pmol  | 1 pmol        | 4.5 pmol  | -Quantitation of DEX in blood samples.                                                                                                                       | *LLE of plasma samples with diethylether.<br>*Total run time was 10 min. DEX was eluted at 5.0 min.                                               |
| <b>LC-MS/MS</b> |               |               |           |                                                                                                                                                              |                                                                                                                                                   |
| [38]            | 2.5-250 ng/mL | 0.6 ng/mL     | 2.5 ng/mL | -Simultaneous determination of DEX and DEX palmitate in human plasma.<br>-Application to a pharmacokinetic study following IV injection to human volunteers. | *LLE of plasma samples with diethylether : dichloromethane (60:40, v/v).<br>* Total run time was 6 min. DEX was eluted at 4.2 min.                |
| [39]            | 0.5-500 µg/L  | Not mentioned | 0.5 µg/L  | -Determination of DEX and DEX sodium palmitate in plasma and human cochlear perilymph.<br>-Application to a pharmacokinetic study.                           | *Protein precipitation of the analyzed samples with methanol/acetonitrile (1: 4, v/v).<br>* Total run time was 5 min. DEX was eluted at 2.79 min. |
| [40]            | 2-1000 ng/mL  | 0.01 ng/mL    | 2 ng/mL   | -Determination of the pharmacokinetics of DEX in broiler chicken.<br>-Quantitation of DEX in plasma samples.                                                 | *Protein precipitation of the analyzed samples with 20% trichloroacetic acid followed by LLE with diethyl ether.<br>*Total run time was 6 min.    |
| <b>UPLC-MS</b>  |               |               |           |                                                                                                                                                              |                                                                                                                                                   |
| [41]            | 1-5 µg/L      | 0.1 µg/L      | 0.6 µg/L  | -Multidetecion of corticosteroids in sports doping and                                                                                                       | *LLE of the analyzed samples with diethylether.                                                                                                   |

|                          |                |               |            |                                                                                                                                                                                  |                                                                                           |
|--------------------------|----------------|---------------|------------|----------------------------------------------------------------------------------------------------------------------------------------------------------------------------------|-------------------------------------------------------------------------------------------|
|                          |                |               |            | veterinary control.<br>-Multiresidue analysis of corticosteroids in human and veterinary urine.                                                                                  | *Total run time was 7.5 min. DEX was eluted at 3.6 min.                                   |
| <b><i>UPLC-MS/MS</i></b> |                |               |            |                                                                                                                                                                                  |                                                                                           |
| [42]                     | 5-500nmol/L    | Not mentioned | 1 nmol/L   | -Determination of corticosteroid mixtures in plasma, urine, and saliva.                                                                                                          | *SPE of the analyzed sample.<br>* Total run time was 3 min. DEX was eluted at 2.02 min.   |
| <b>Current method</b>    | 0.01-0.5 ng/mL | 0.004 ng/mL   | 0.01 ng/mL | -Determination of LND and DEX in plasma samples.<br>-Determination of the pharmacokinetics of DEX either alone or in combination with LND following oral administration to rats. | *SPE of the analyzed sample.<br>* Total run time was 1.5 min. DEX was eluted at 0.36 min. |

a)

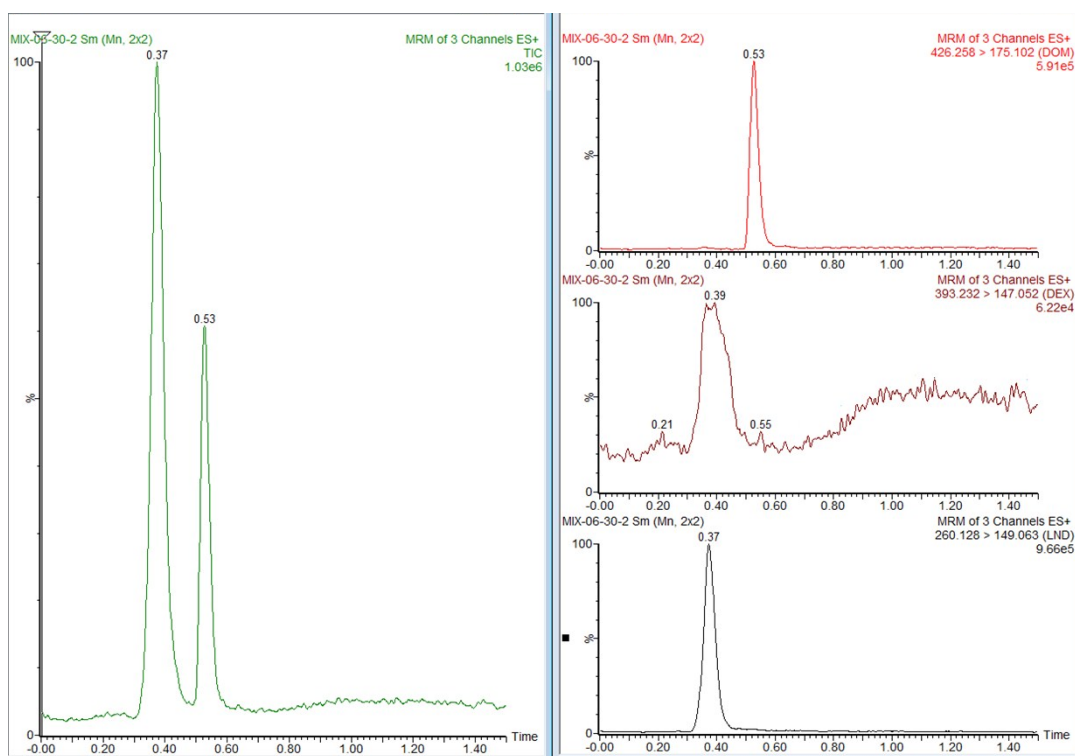

b)

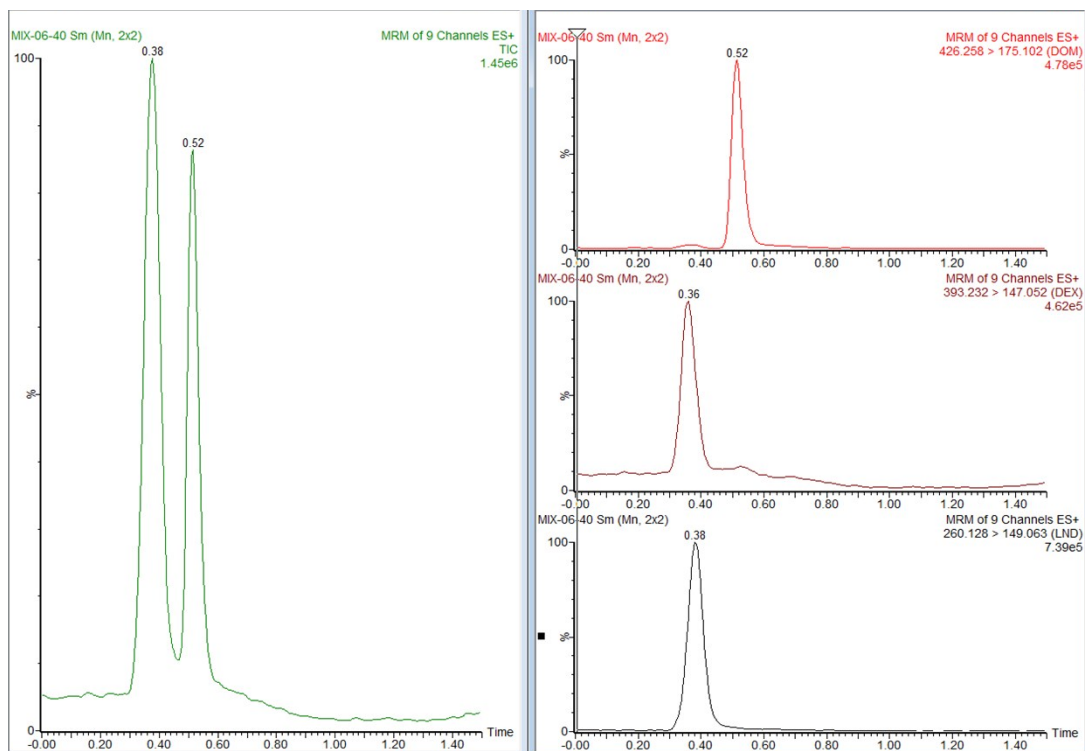

c)

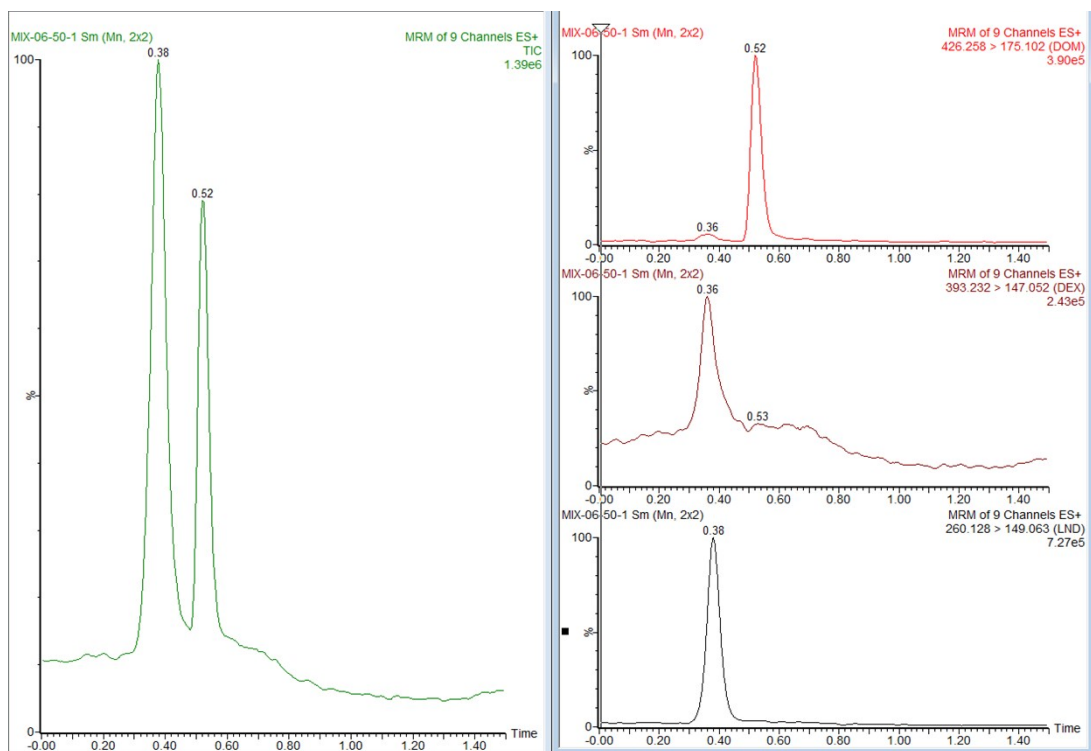

d)

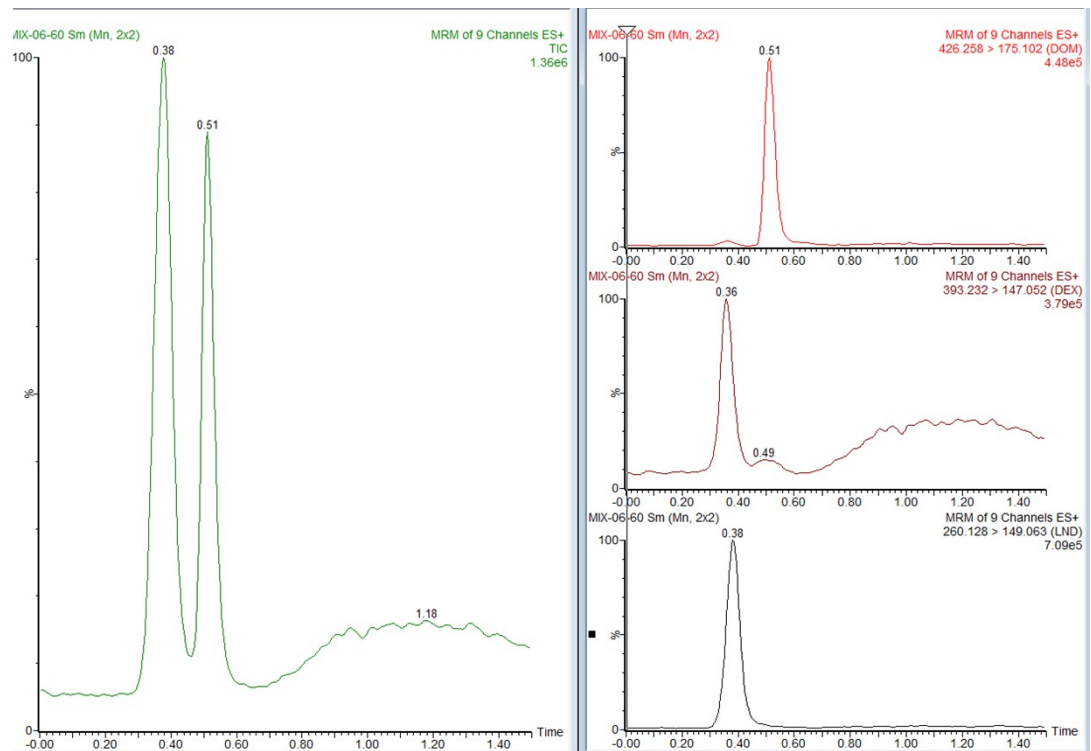

e)

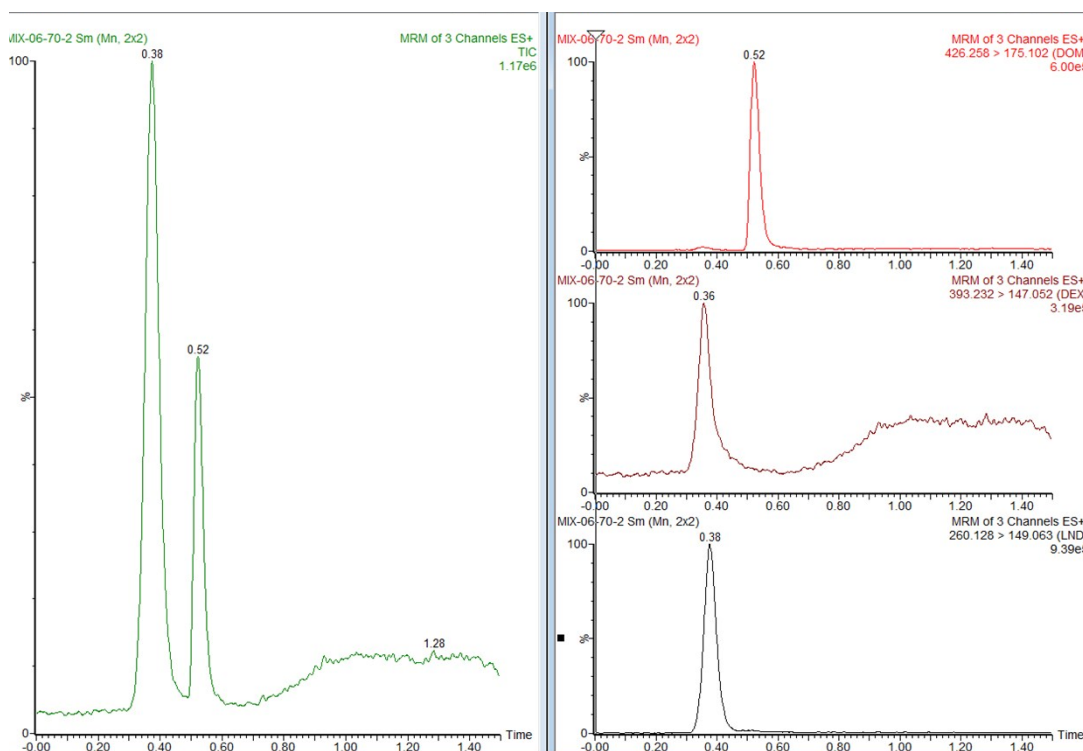

f)

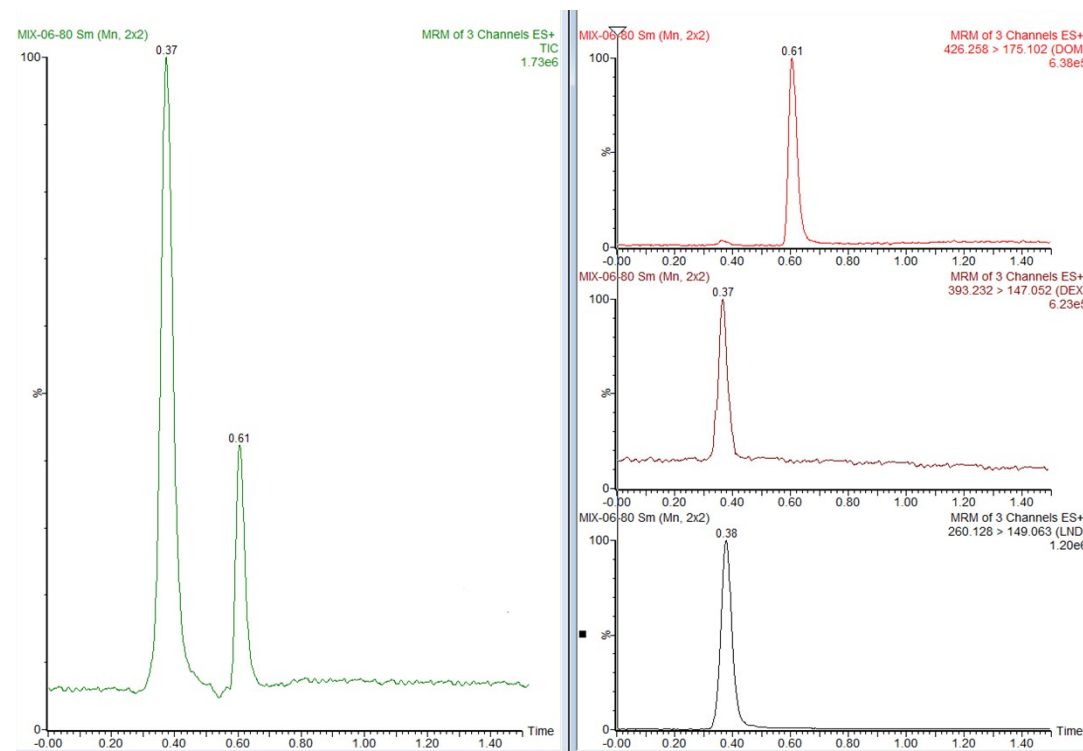

Fig. 1 TIC and MRM chromatograms of standard mixtures of DEX, LND, and OND (IS) showing the effect of acetonitrile% in the mobile phase, 30%, a), 40%, b), 50%, c), 60%, d), 70%, e), and 80%, f). All mobile phases were composed of mixtures of water and acetonitrile in different ratios, all with 0.1% formic acid.

a)

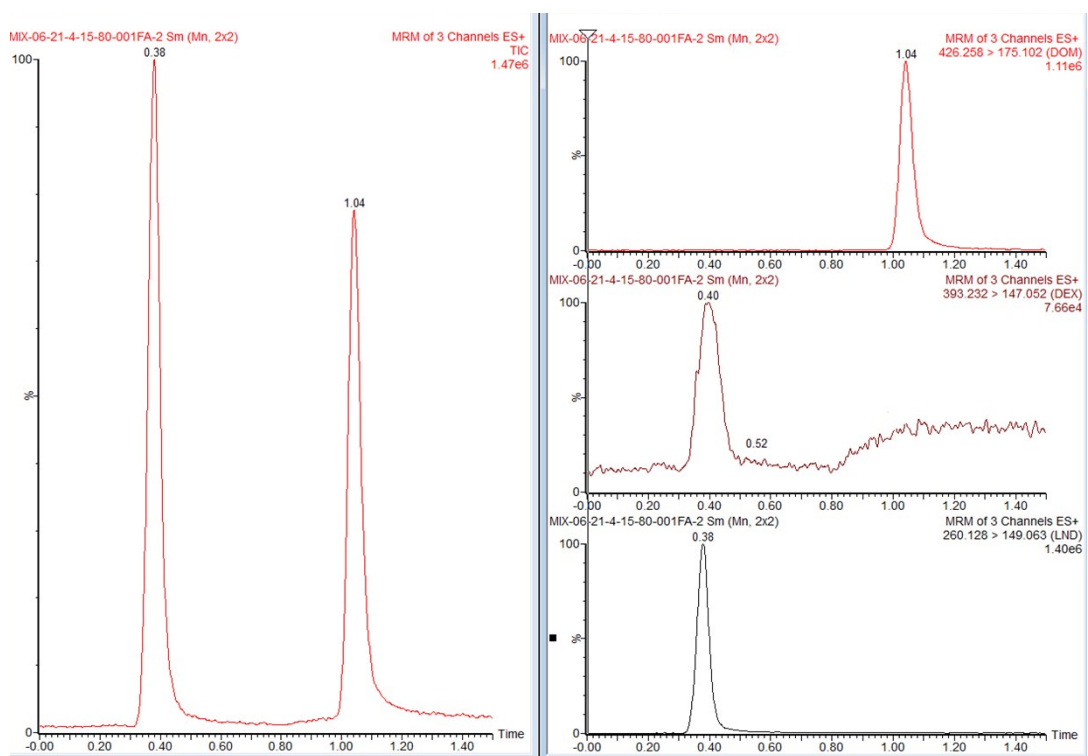

b)

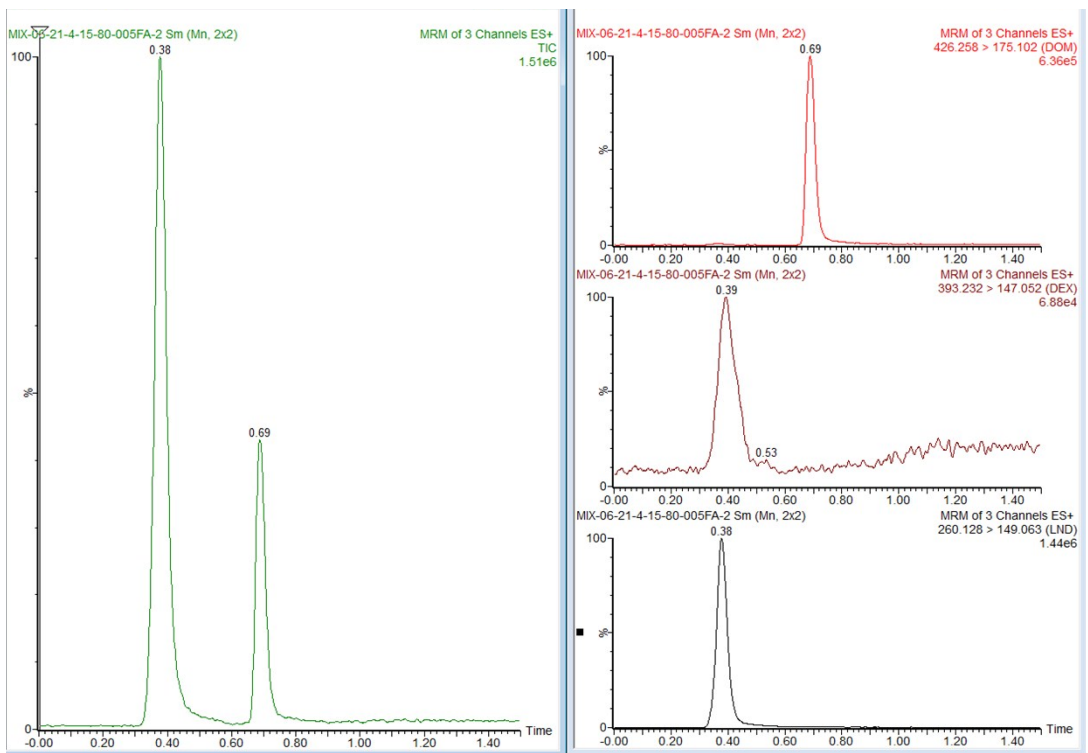



c)

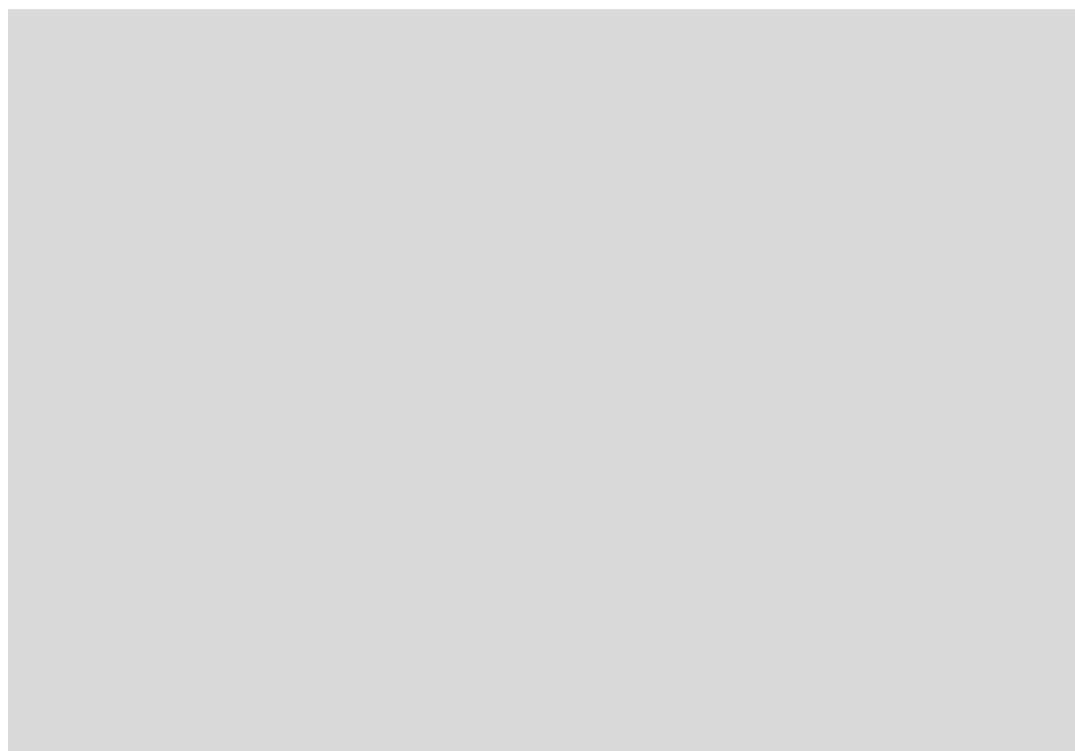

d)

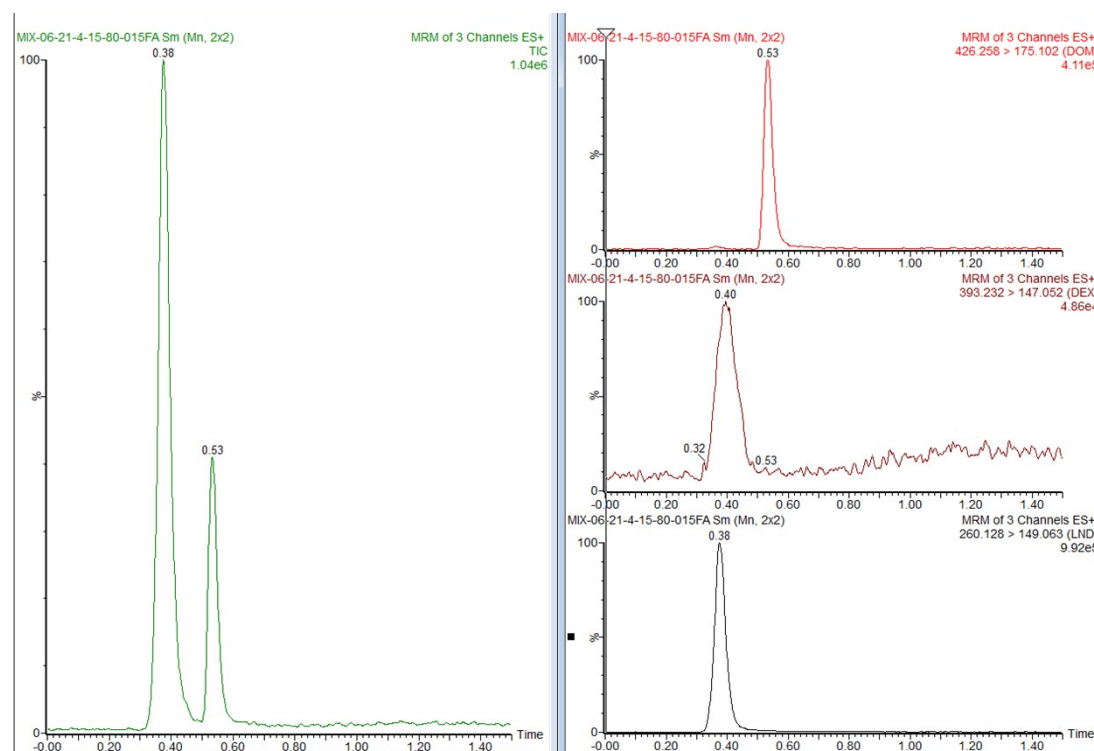

Fig. 2 TIC and MRM chromatograms of standard mixtures of DEX, LND, and OND (IS) showing the effect of formic acid% in the mobile phase, 0.01%, a), 0.05%, b), 0.1%, c), and 0.15%, d). All mobile phases were composed of mixtures of water and 80% acetonitrile with different percentage of formic acid.
